# Supplementary material for: Synergistic antitumor activity by combining trastuzumab with retinoic acid in HER2 positive human breast cancer cells
Source: PubMed Central journal article supplement (PMC5995169; doi:10.18632/oncotarget.25480), 2018-05-29
Supplement: oncotarget-09-26527-s001.pdf [file oncotarget-09-26527-s001.pdf]

## Synergistic antitumor activity by combining trastuzumab with retinoic acid in HER2 positive human breast cancer cells

### SUPPLEMENTARY MATERIALS

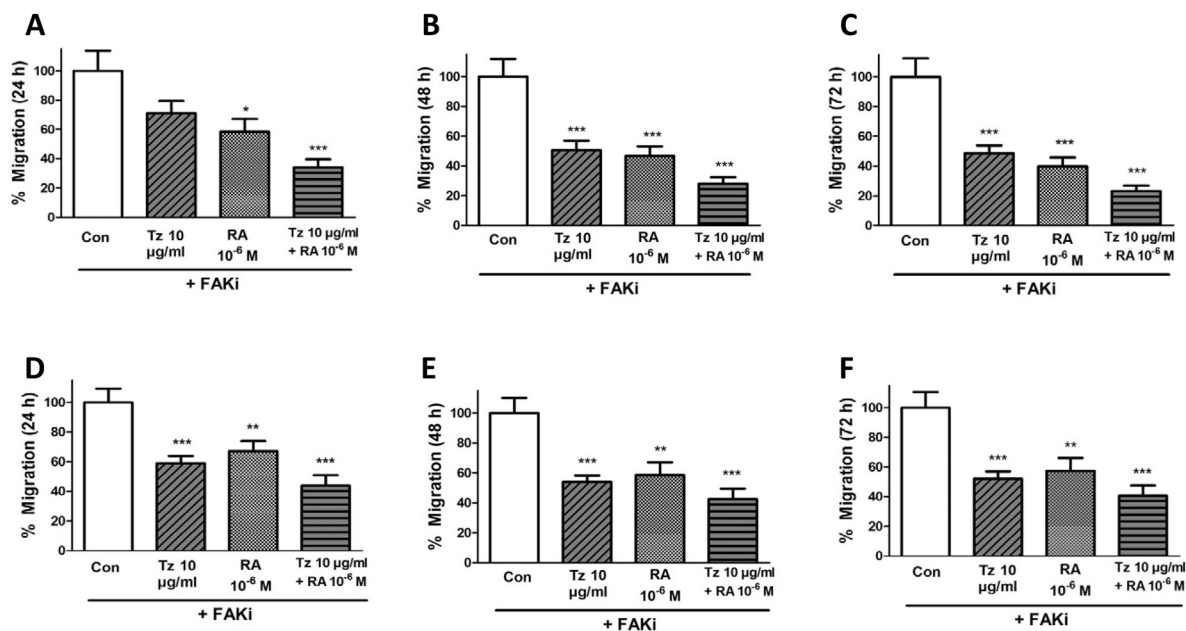

**Supplementary Figure 1: Tz and RA also reduce cell migration in the presence of FAK inhibitor.** (A-C) SKBR3 and (D-F) BT-474 cells were grown in 96-well plates until they formed a monolayer; then, a “wound” was made. The treatments, in the presence of FAK inhibitor (FAKi), were performed for 72 h; cell migration was monitored by taking photographs. (A, D) 24 h (B, E) 48 h (C, F) 72 h of treatment. Gap closure was quantified with the use of NIH image J software. Experiments were performed in triplicate. \*P < 0.05 vs. Control (Con).

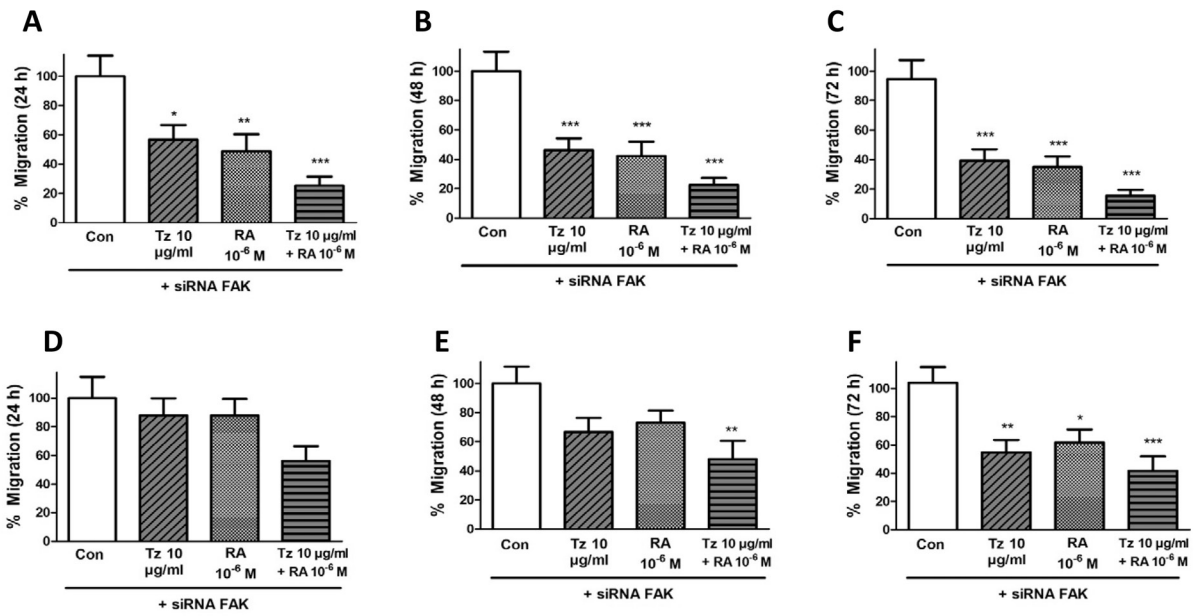

**Supplementary Figure 2: Tz and RA also reduce cell migration in the presence of specific FAK siRNA.** (A-C) SKBR3 and (D-F) BT-474 cells were grown in 96-well plates until they formed a monolayer; then, a “wound” was made. The treatments, in the presence of specific FAK siRNA, were performed for 72 h; cell migration was monitored by taking photographs. (A, D) 24 h (B, E) 48 h (C, F) 72 h of treatment. Gap closure was quantified with the use of NIH image J software. Experiments were performed in triplicate. \*P <0.05 vs. Control (Con).
